# Supplementary figures and images for: Sirt1 deficiency promotes age-related heart failure through enhancing ferroptosis via GATA4-HADHA-GPX4 axis
Source: Research Square preprint supplement (doi:10.21203/rs.3.rs-7140279/v1), 2025-07-31

**Uncropped blots used fro the study**


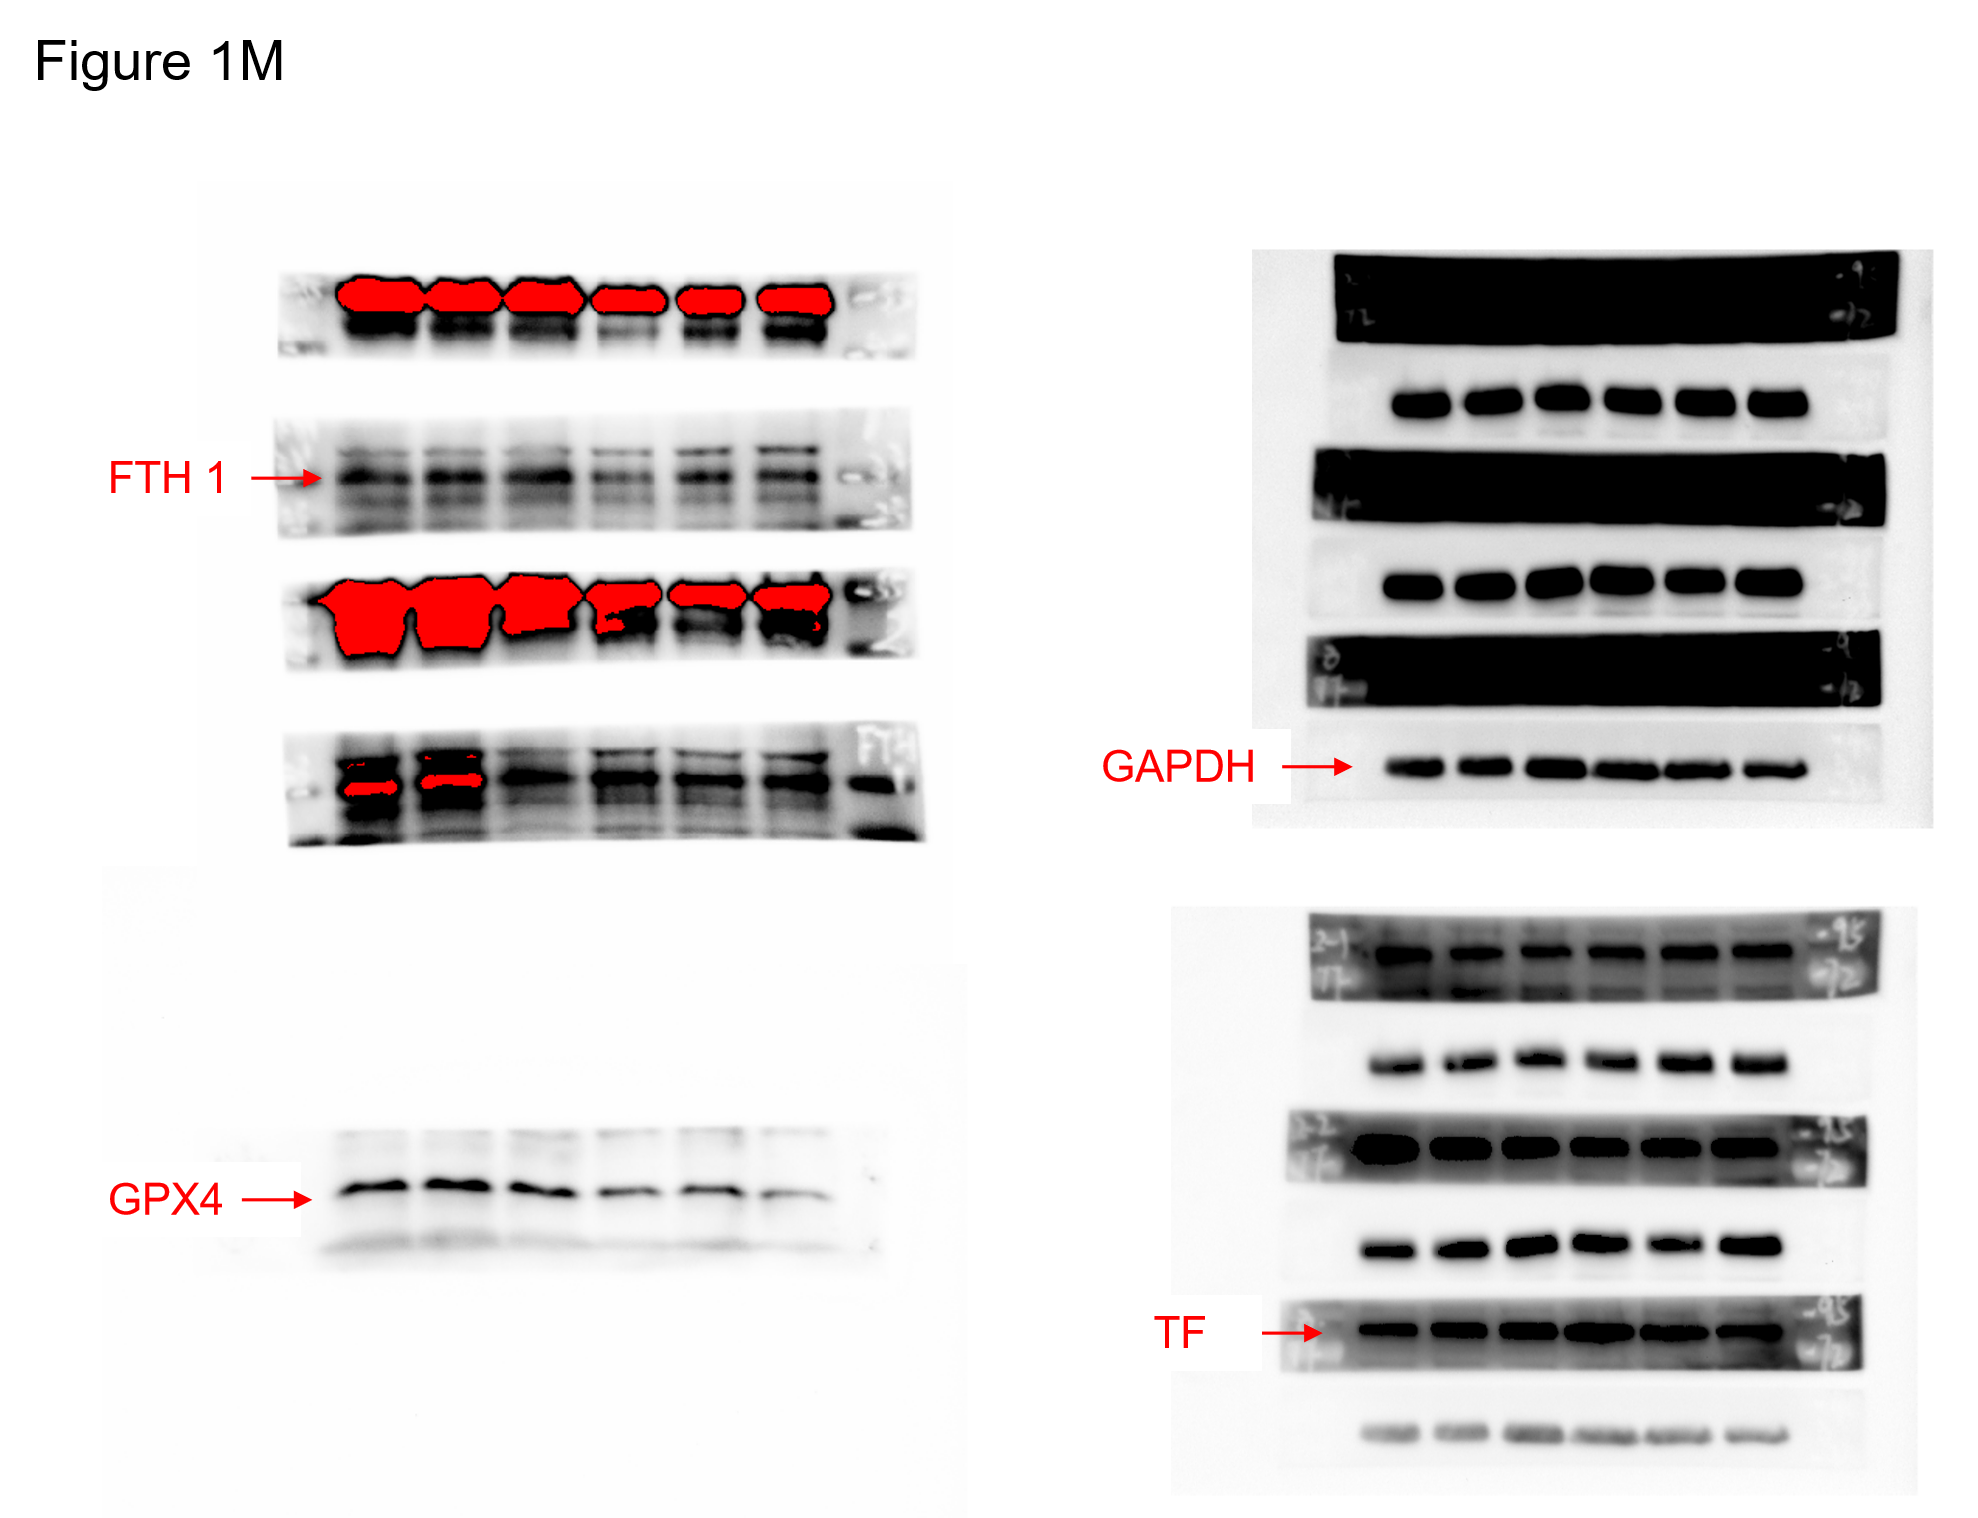


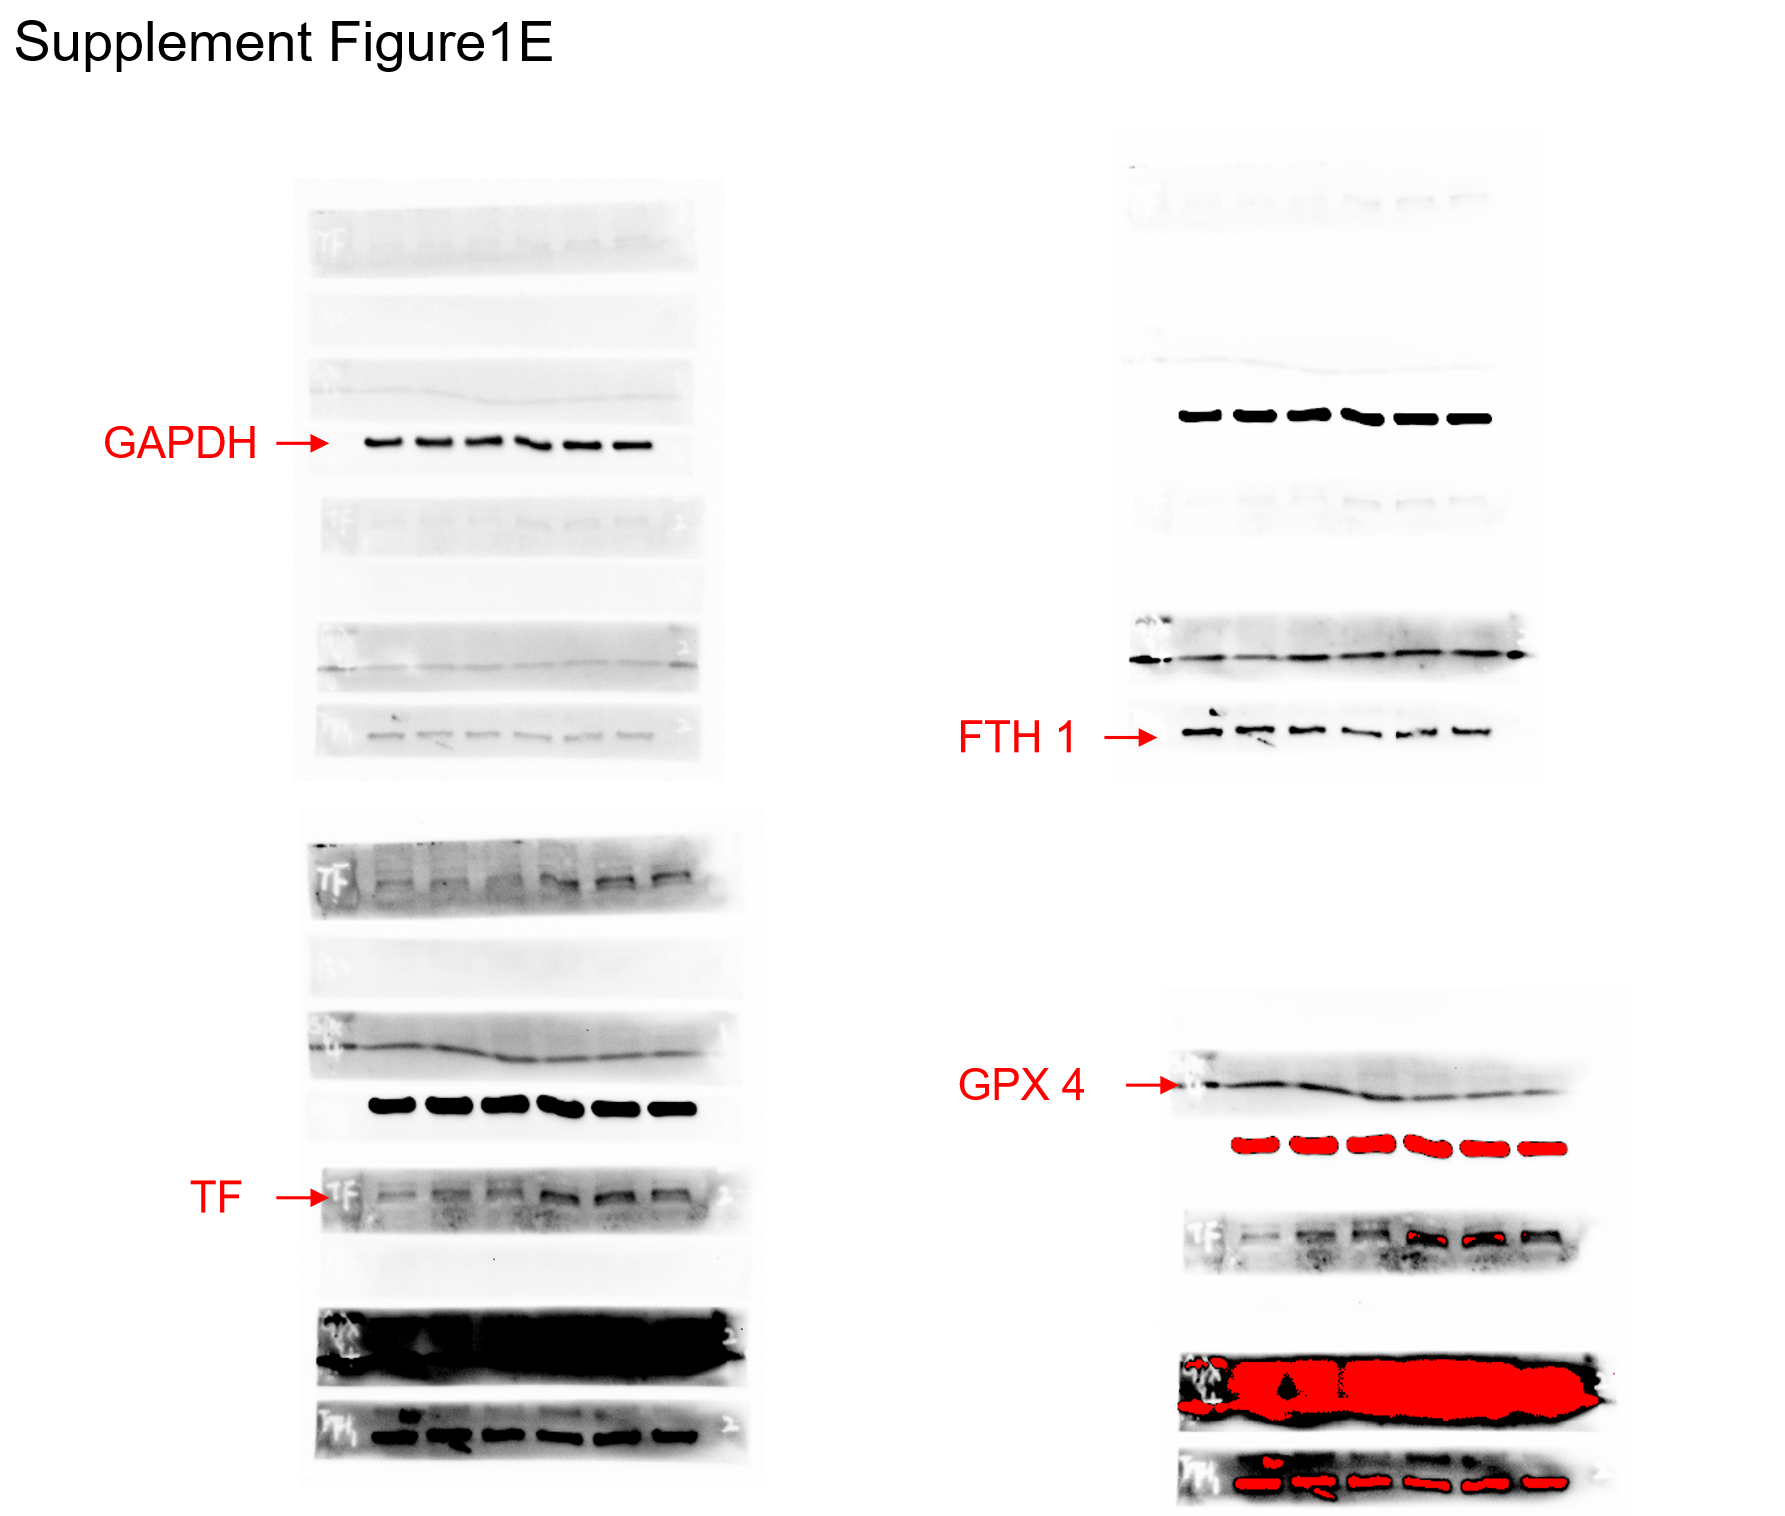


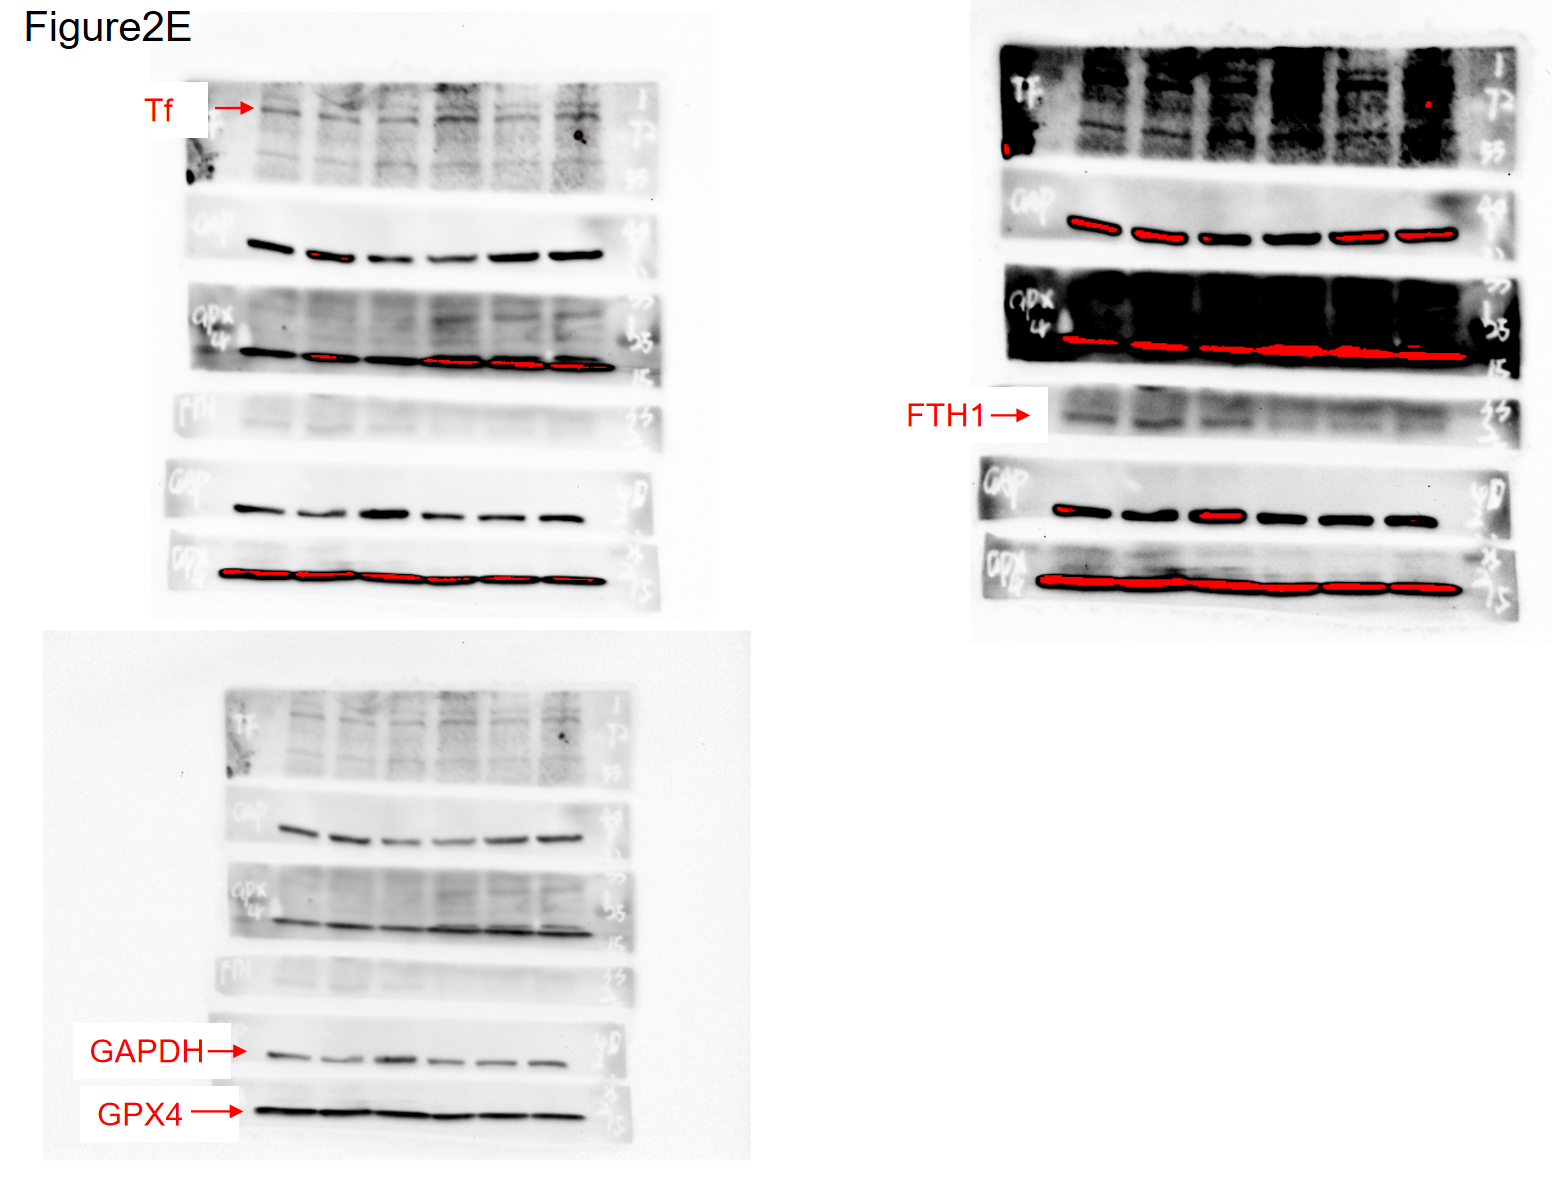

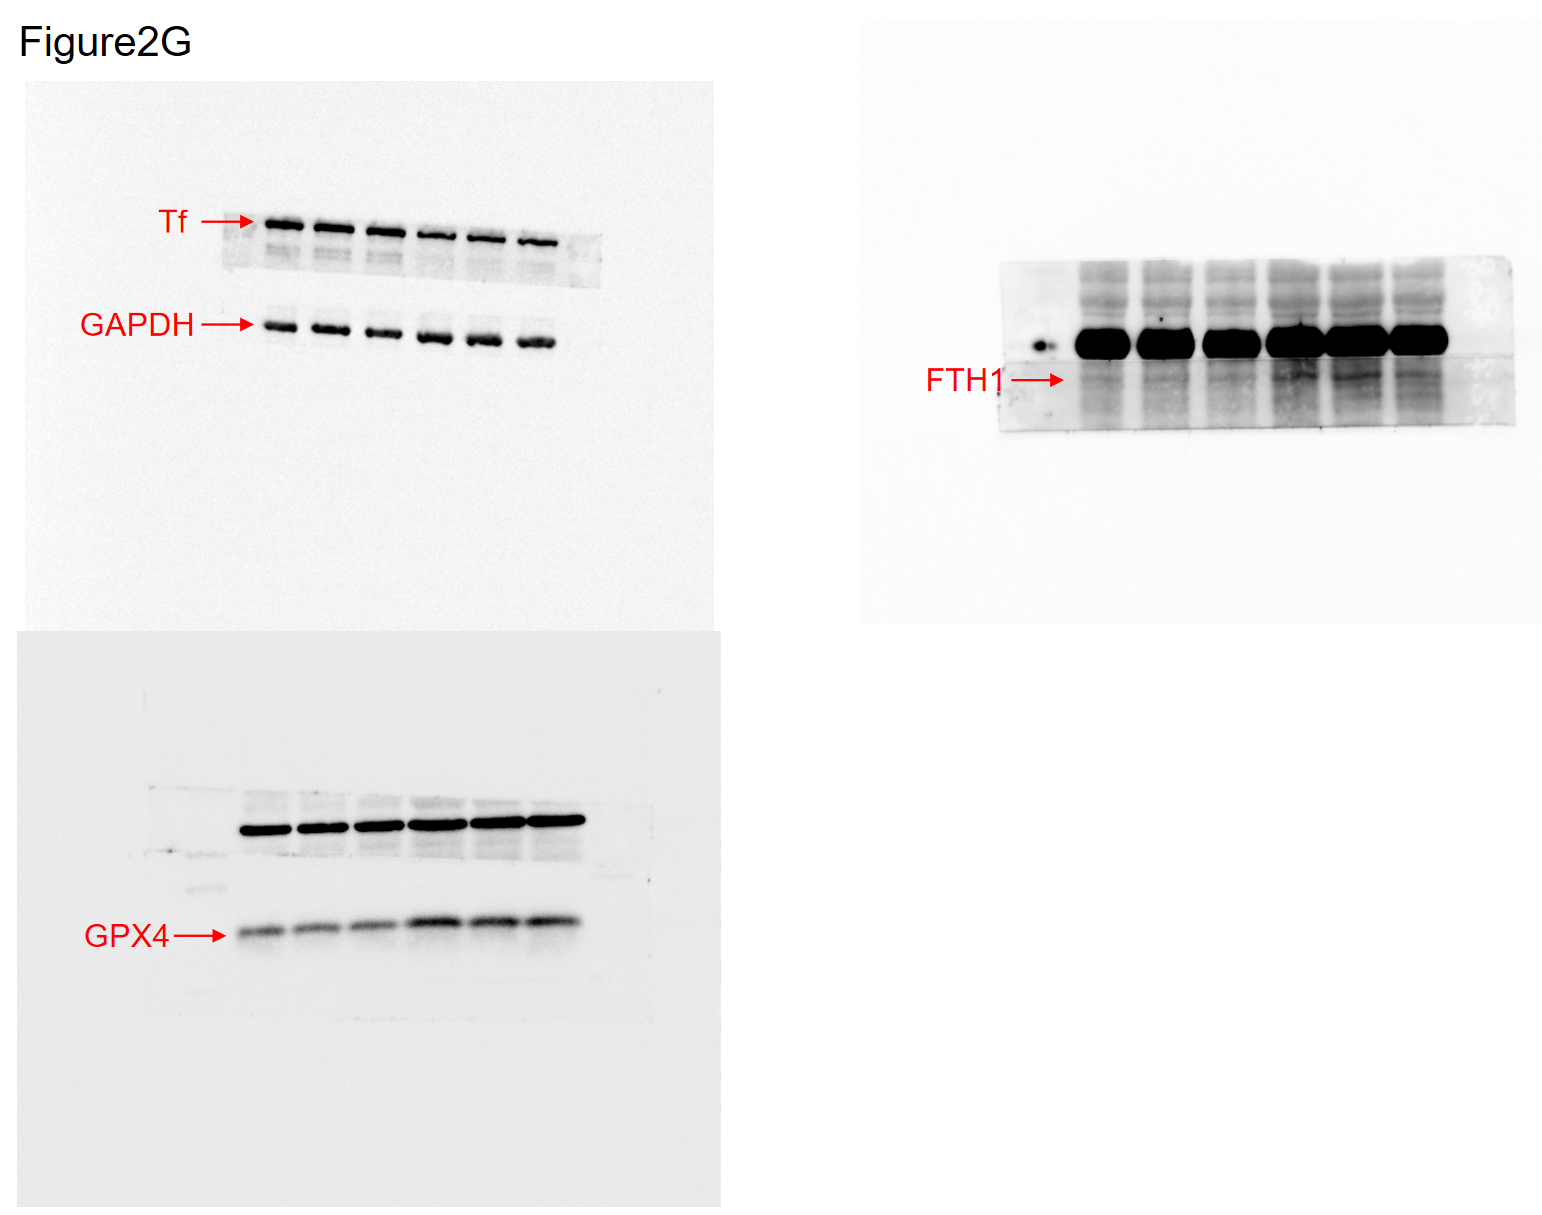

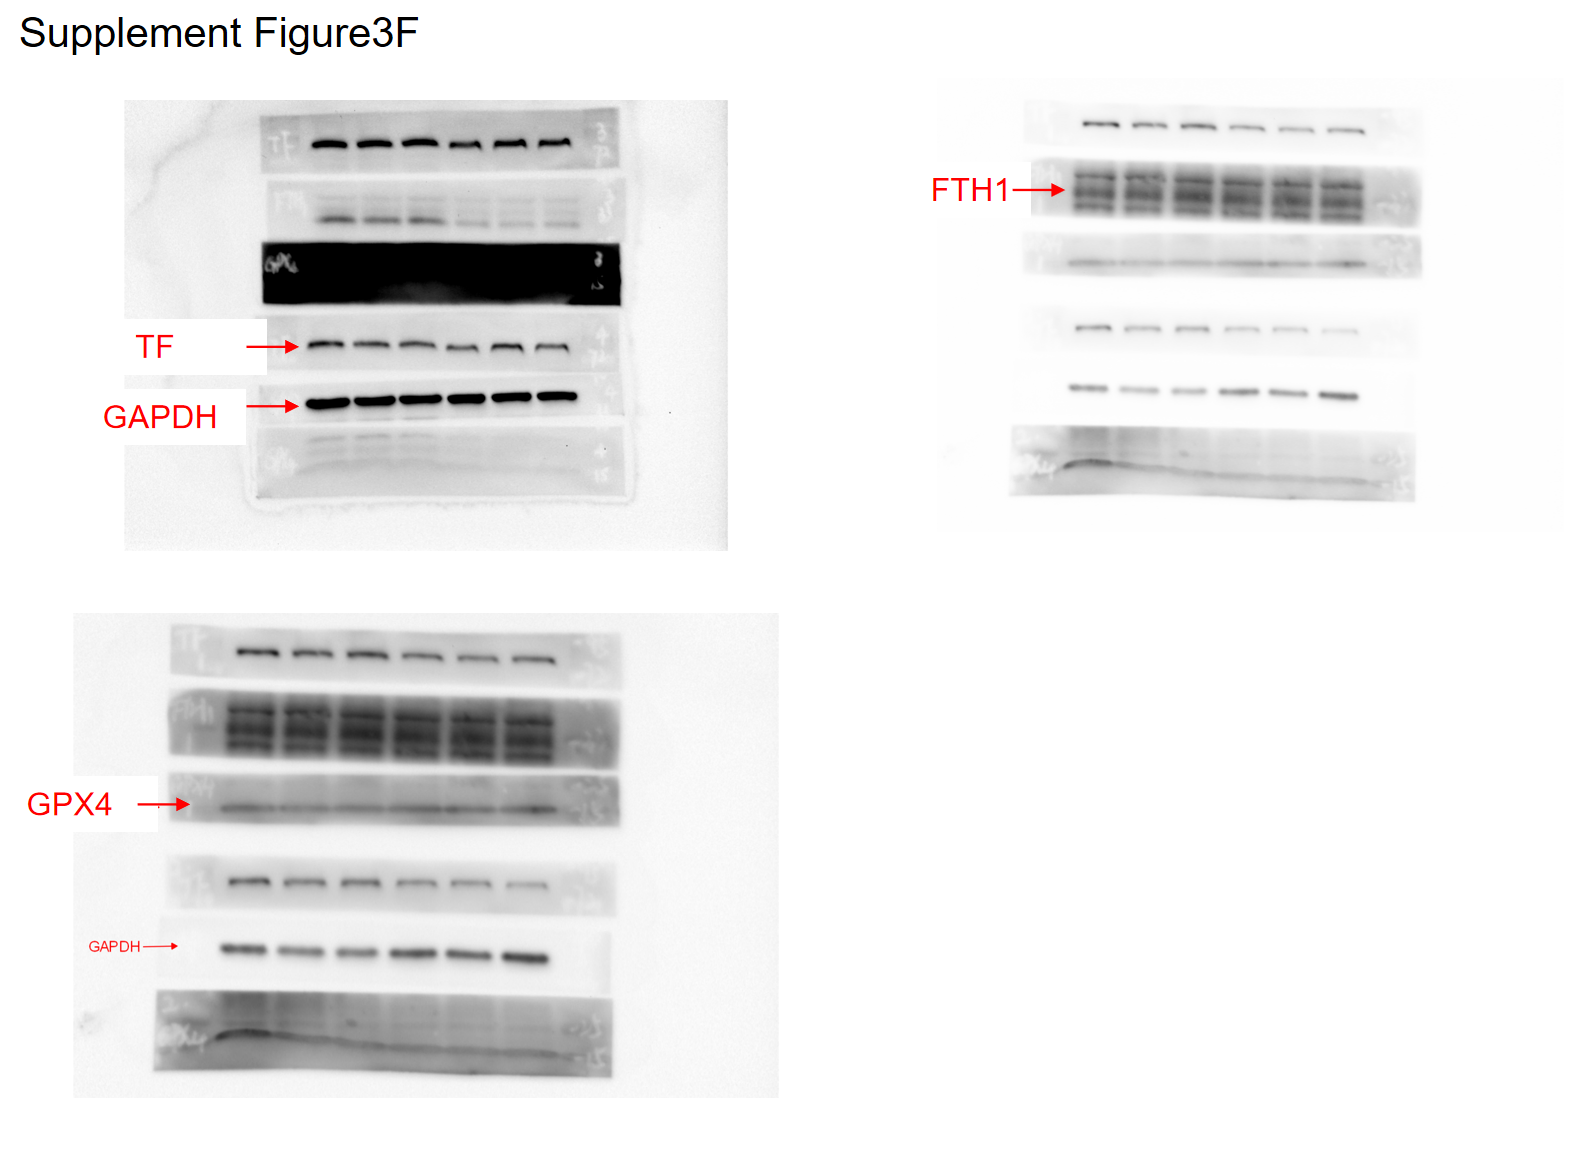

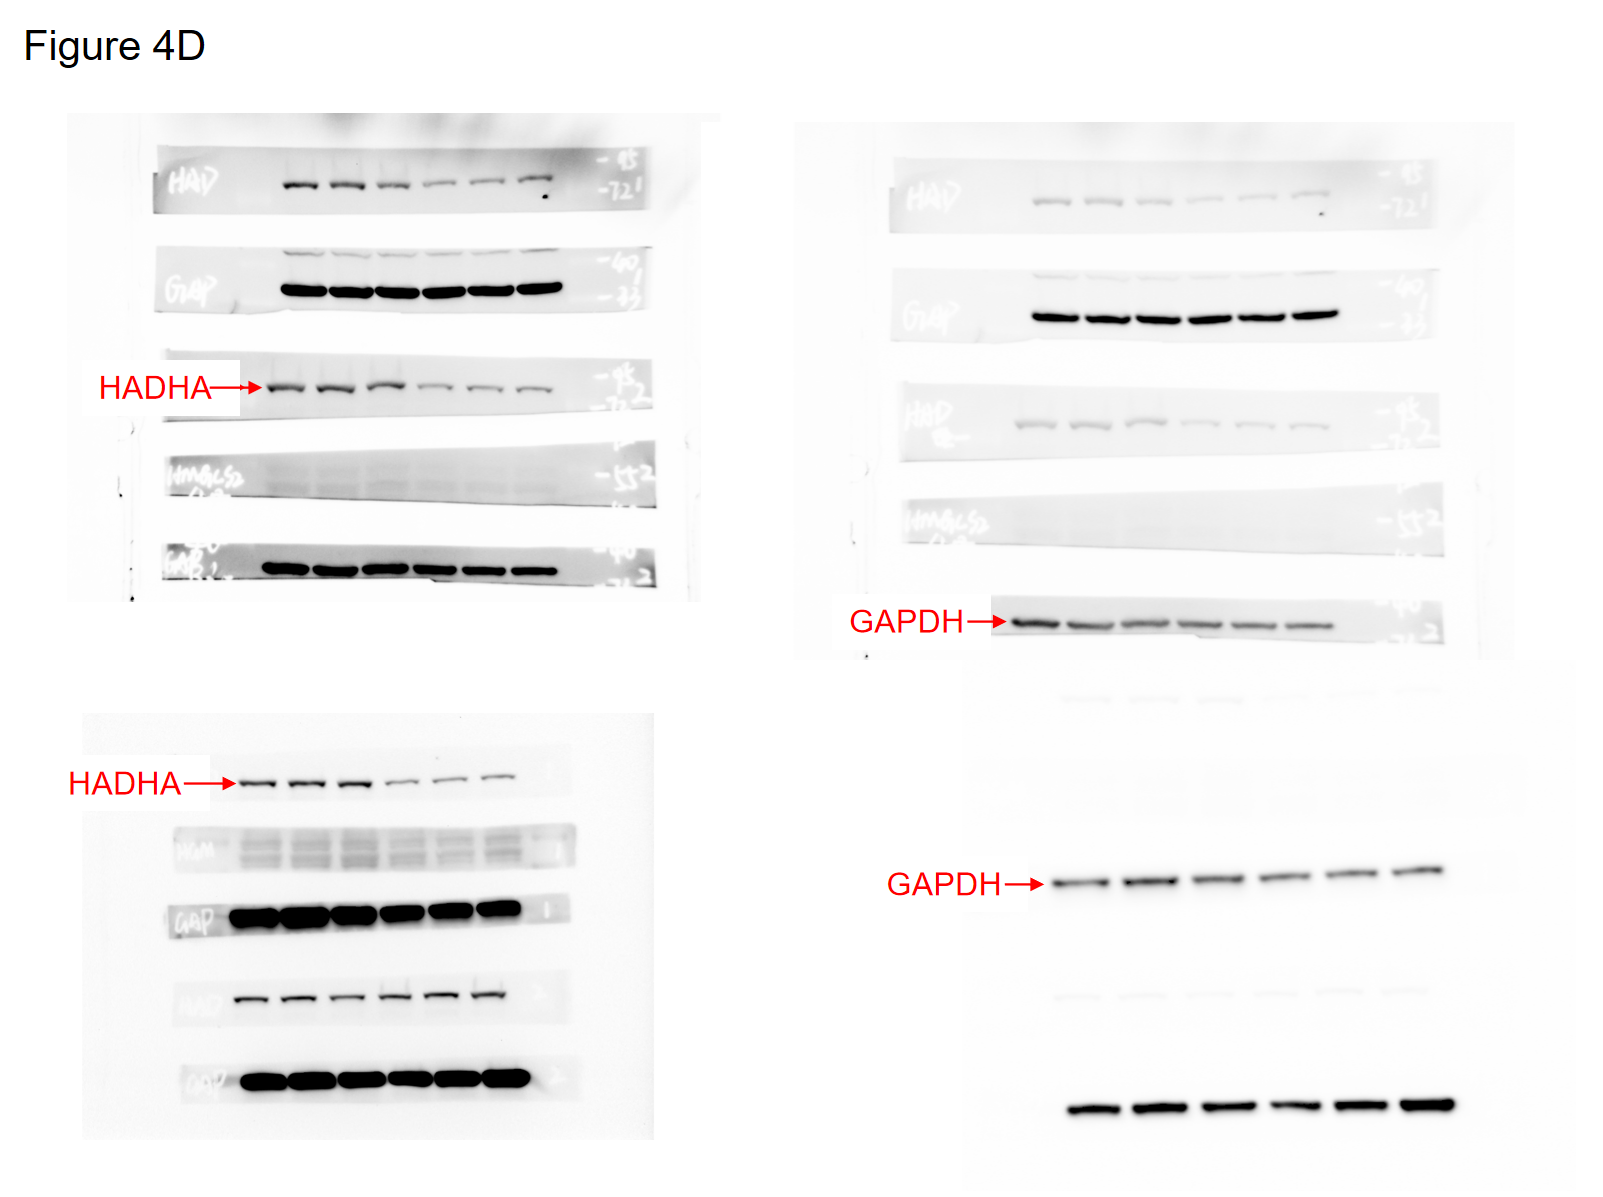

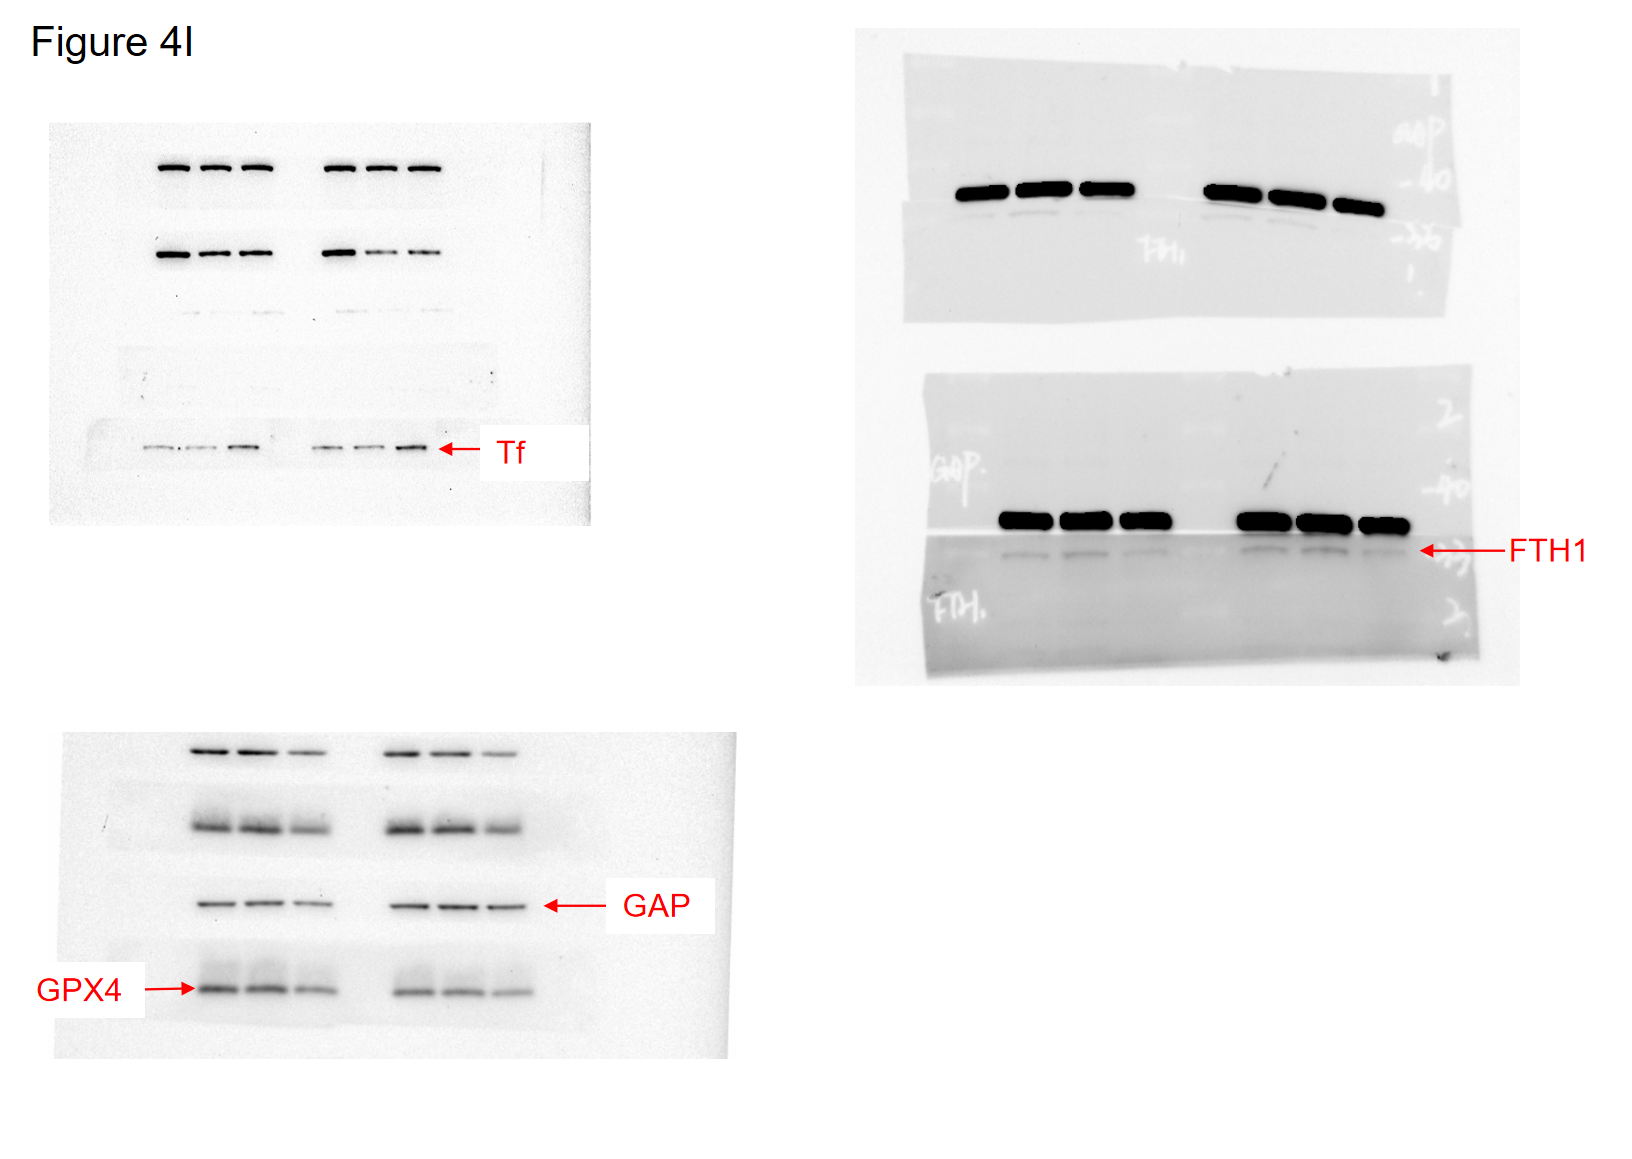

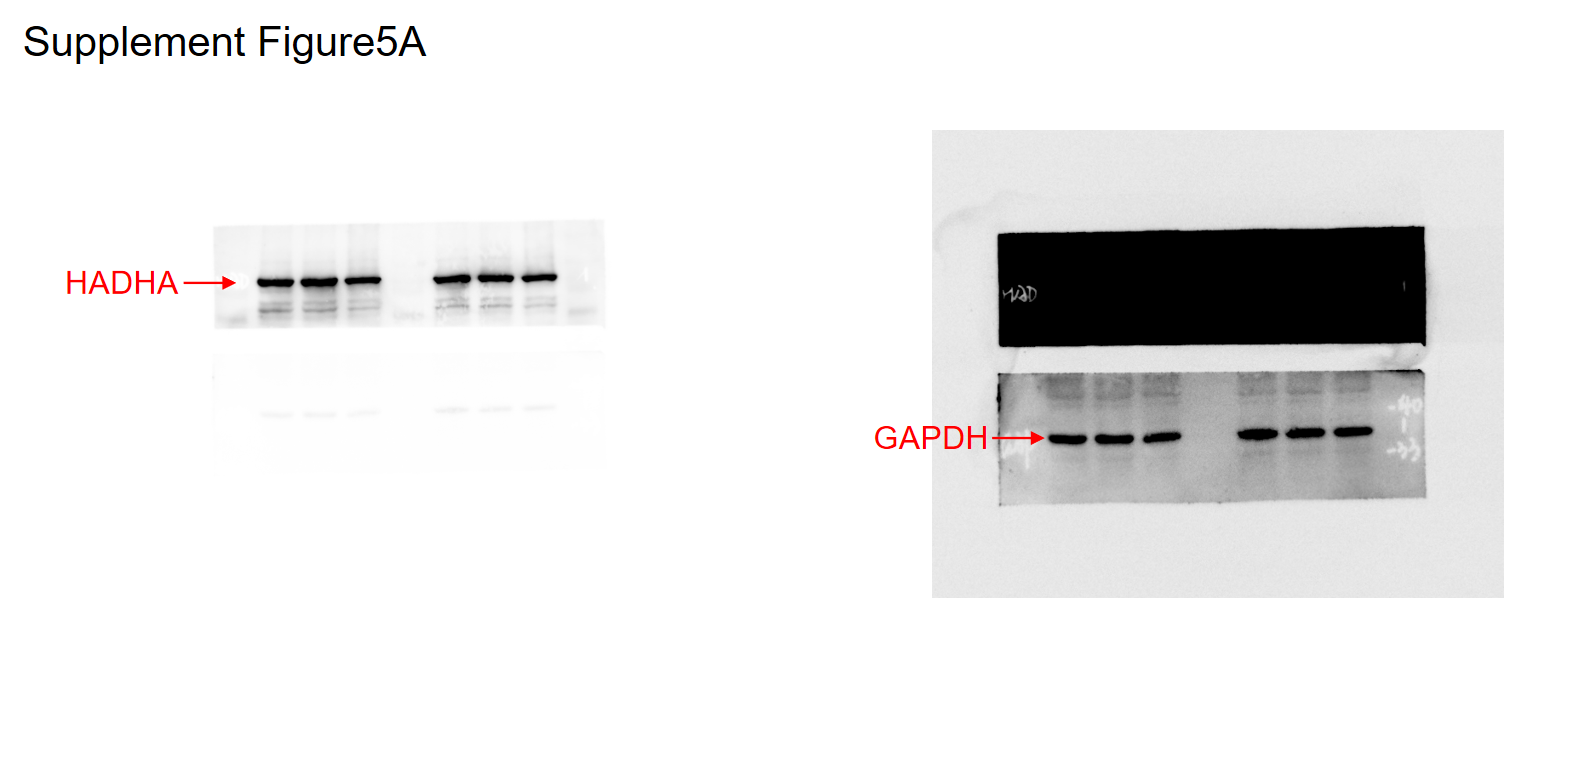

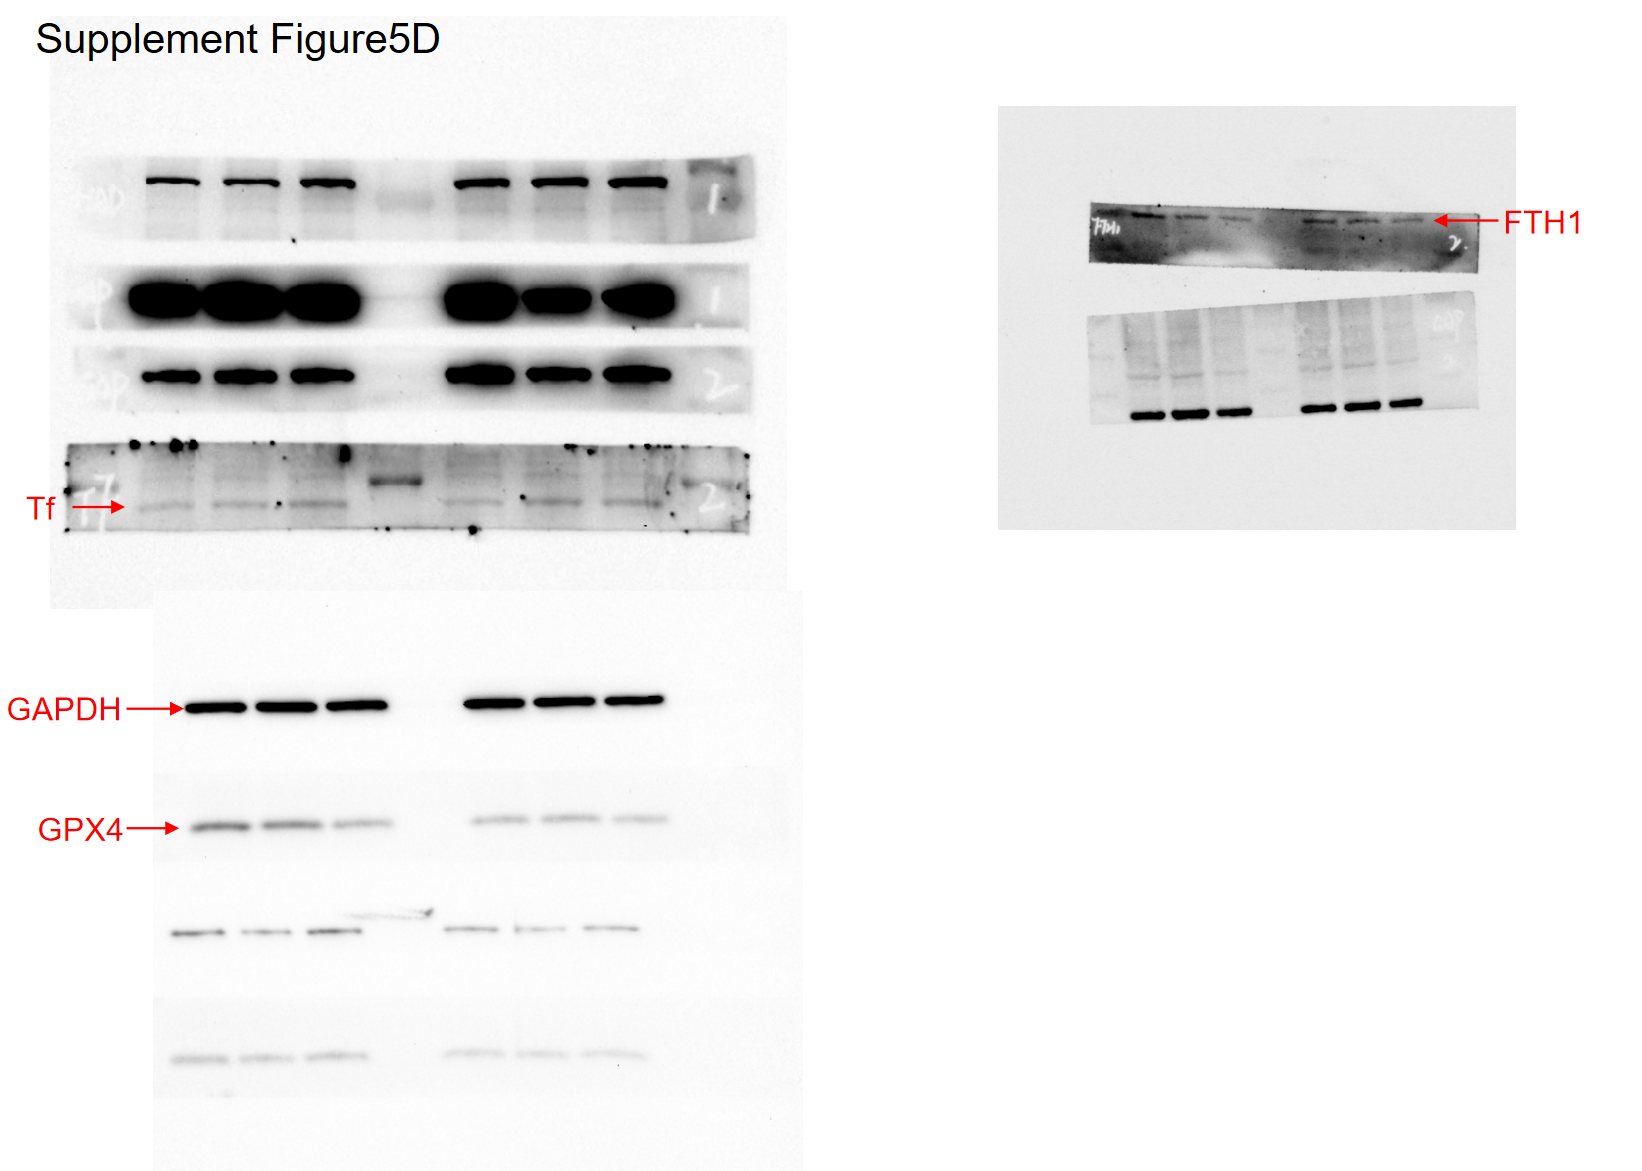

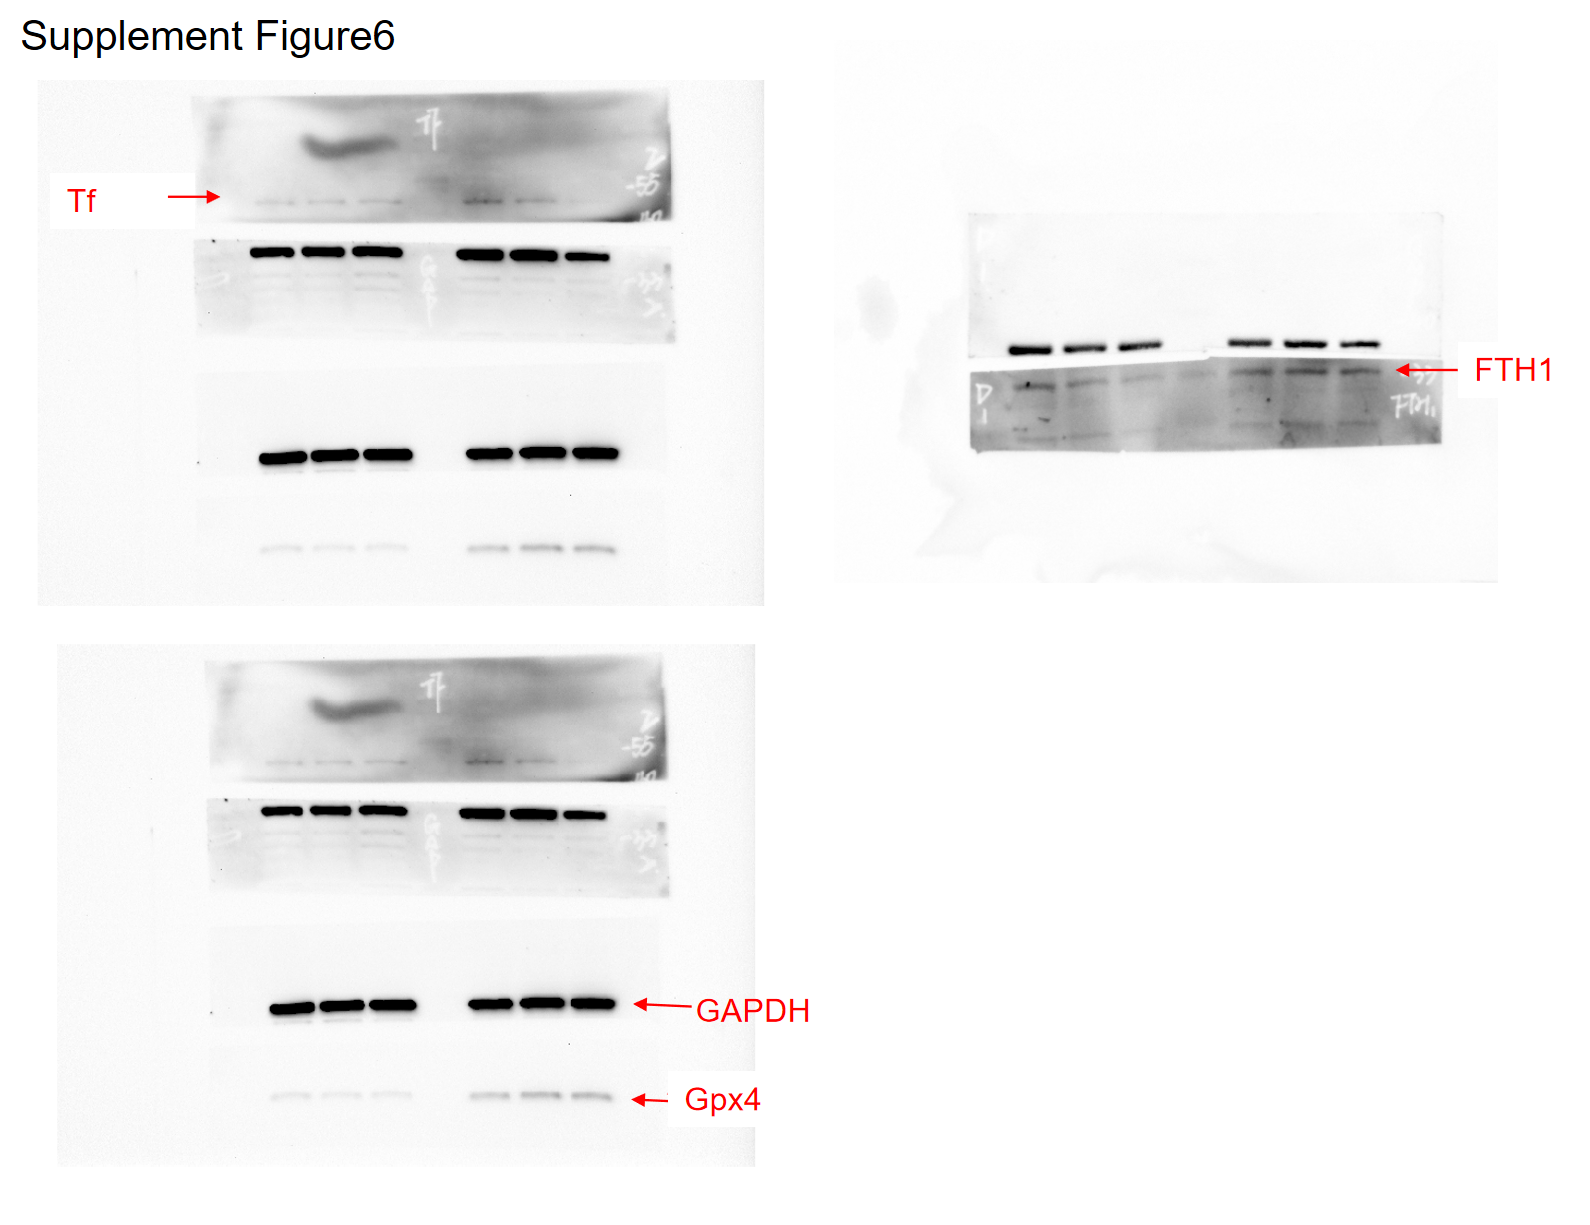

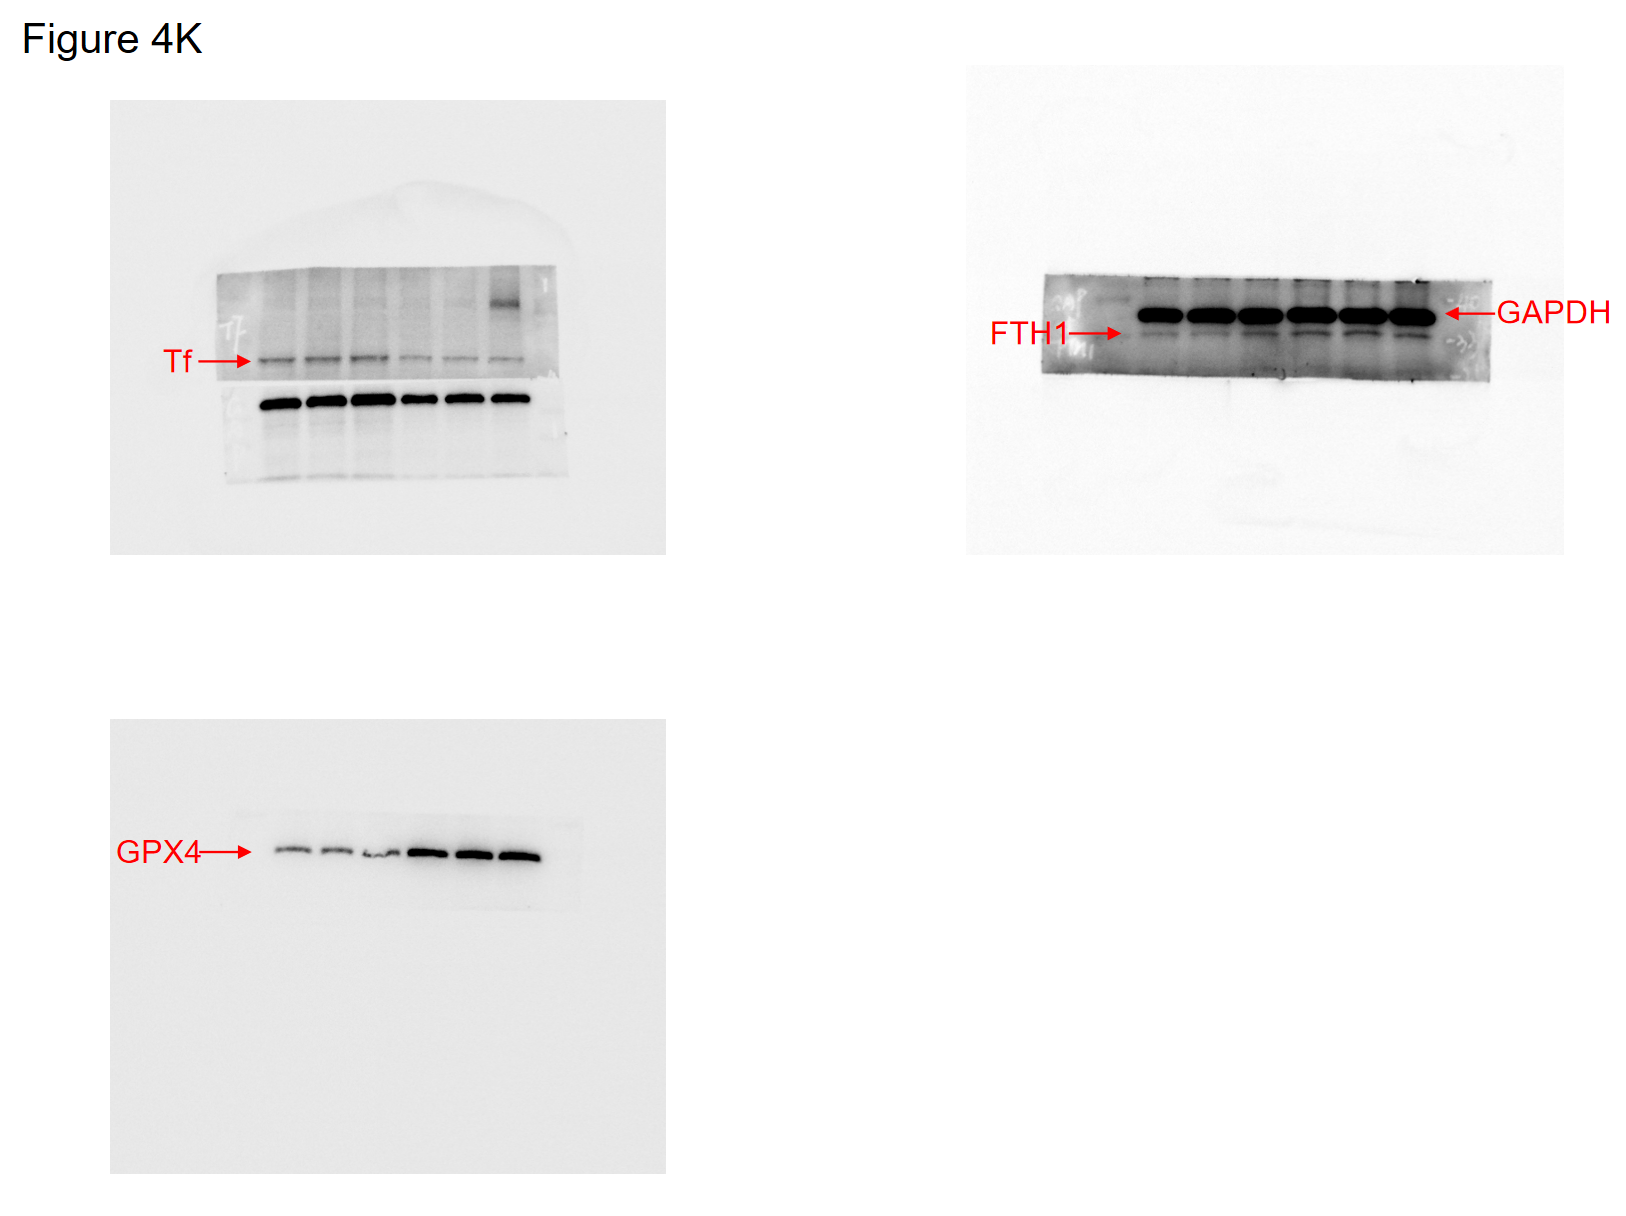

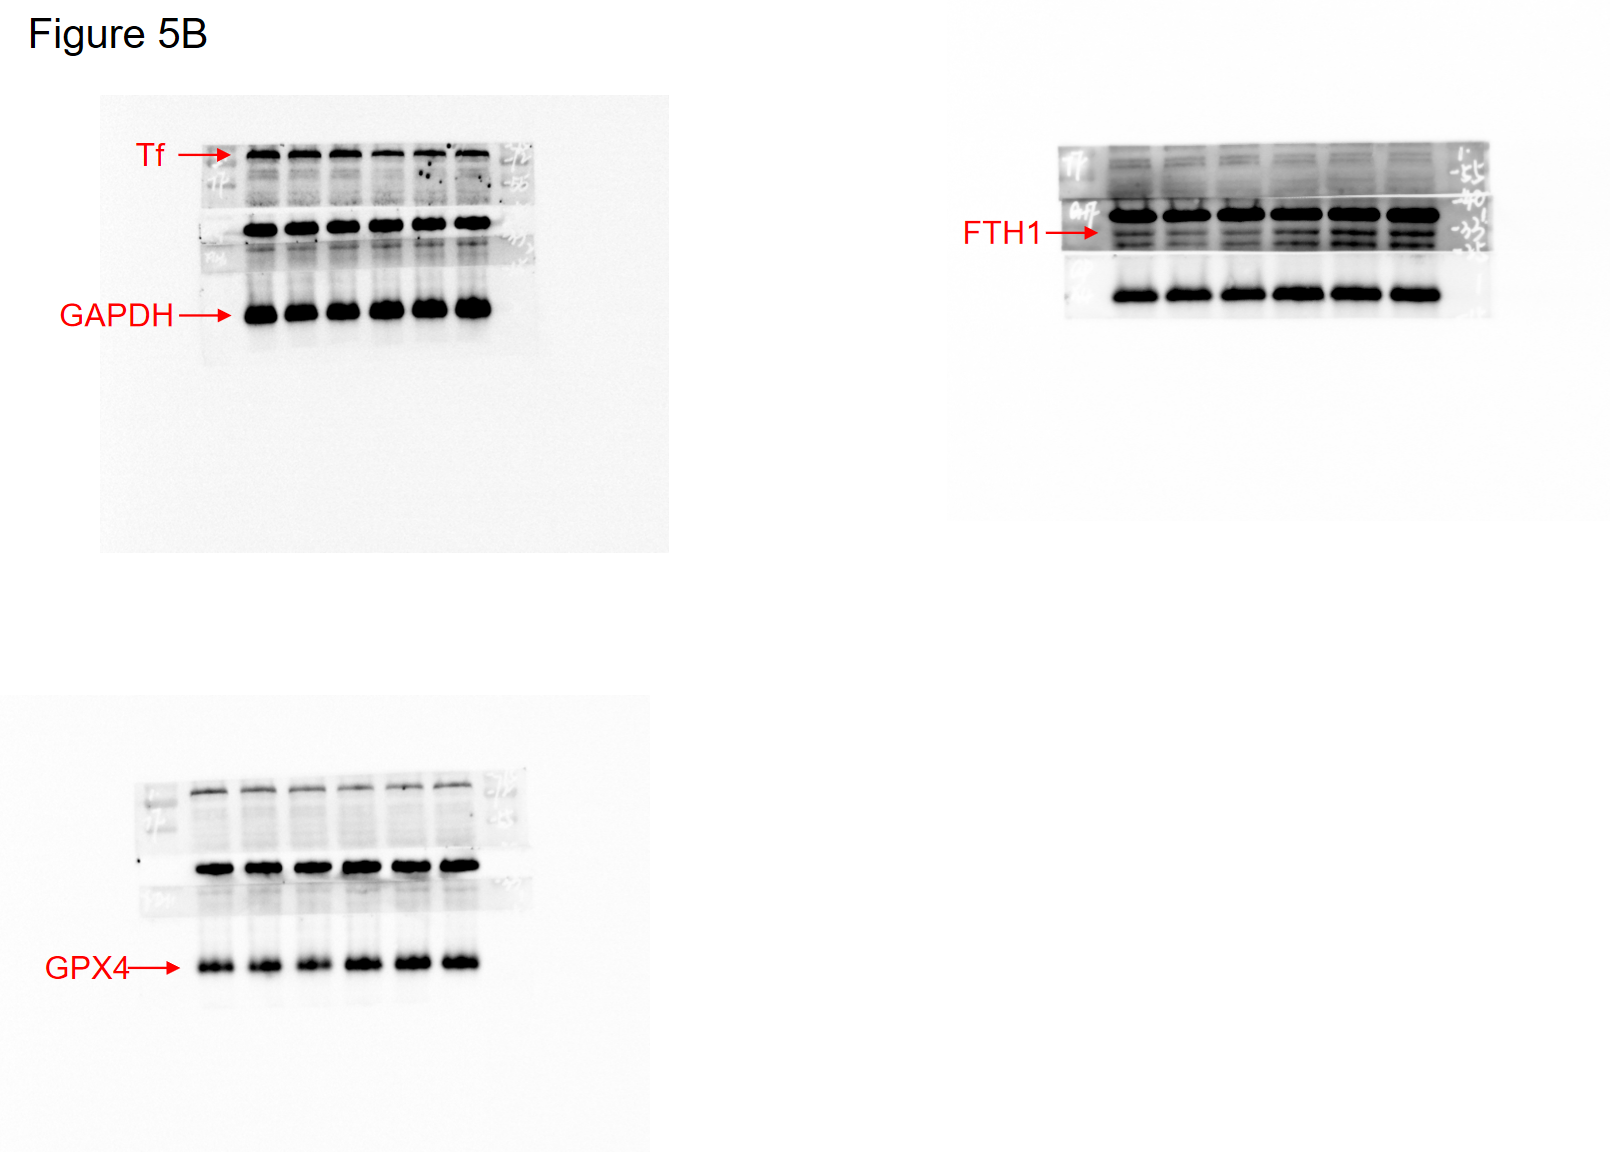

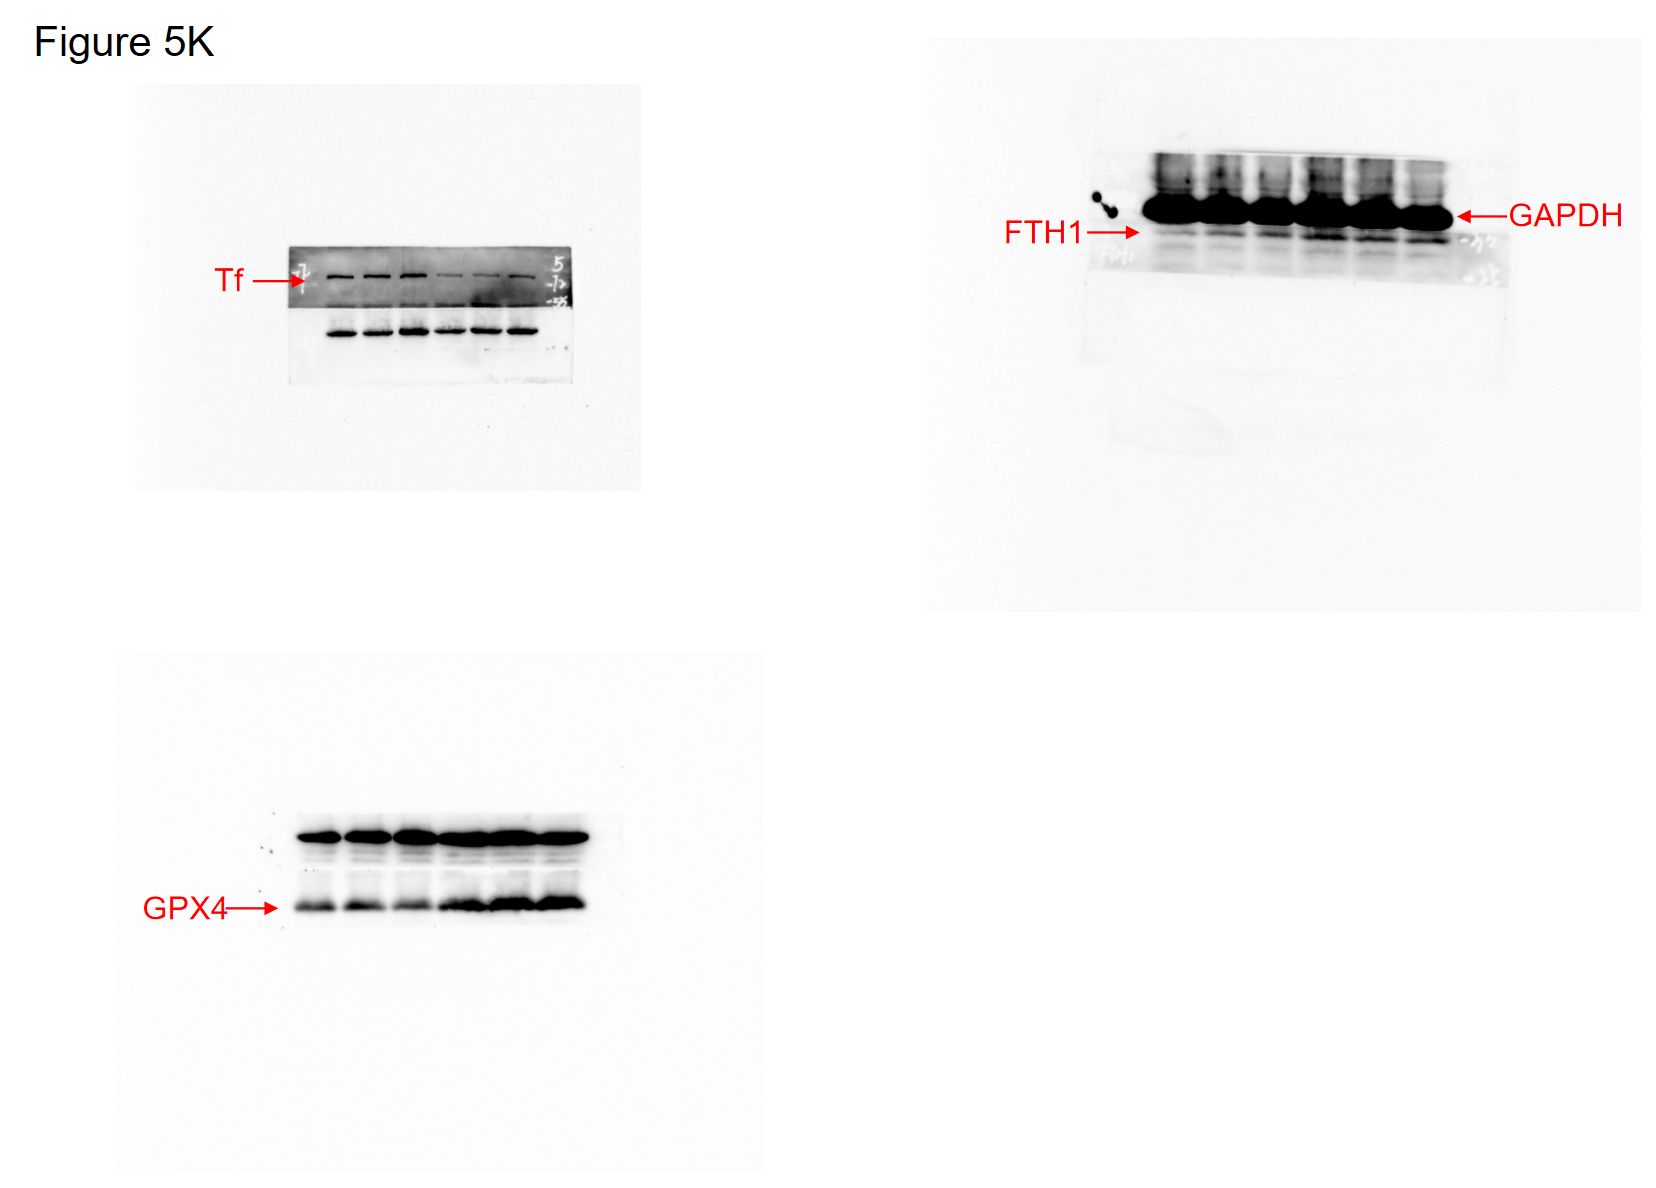

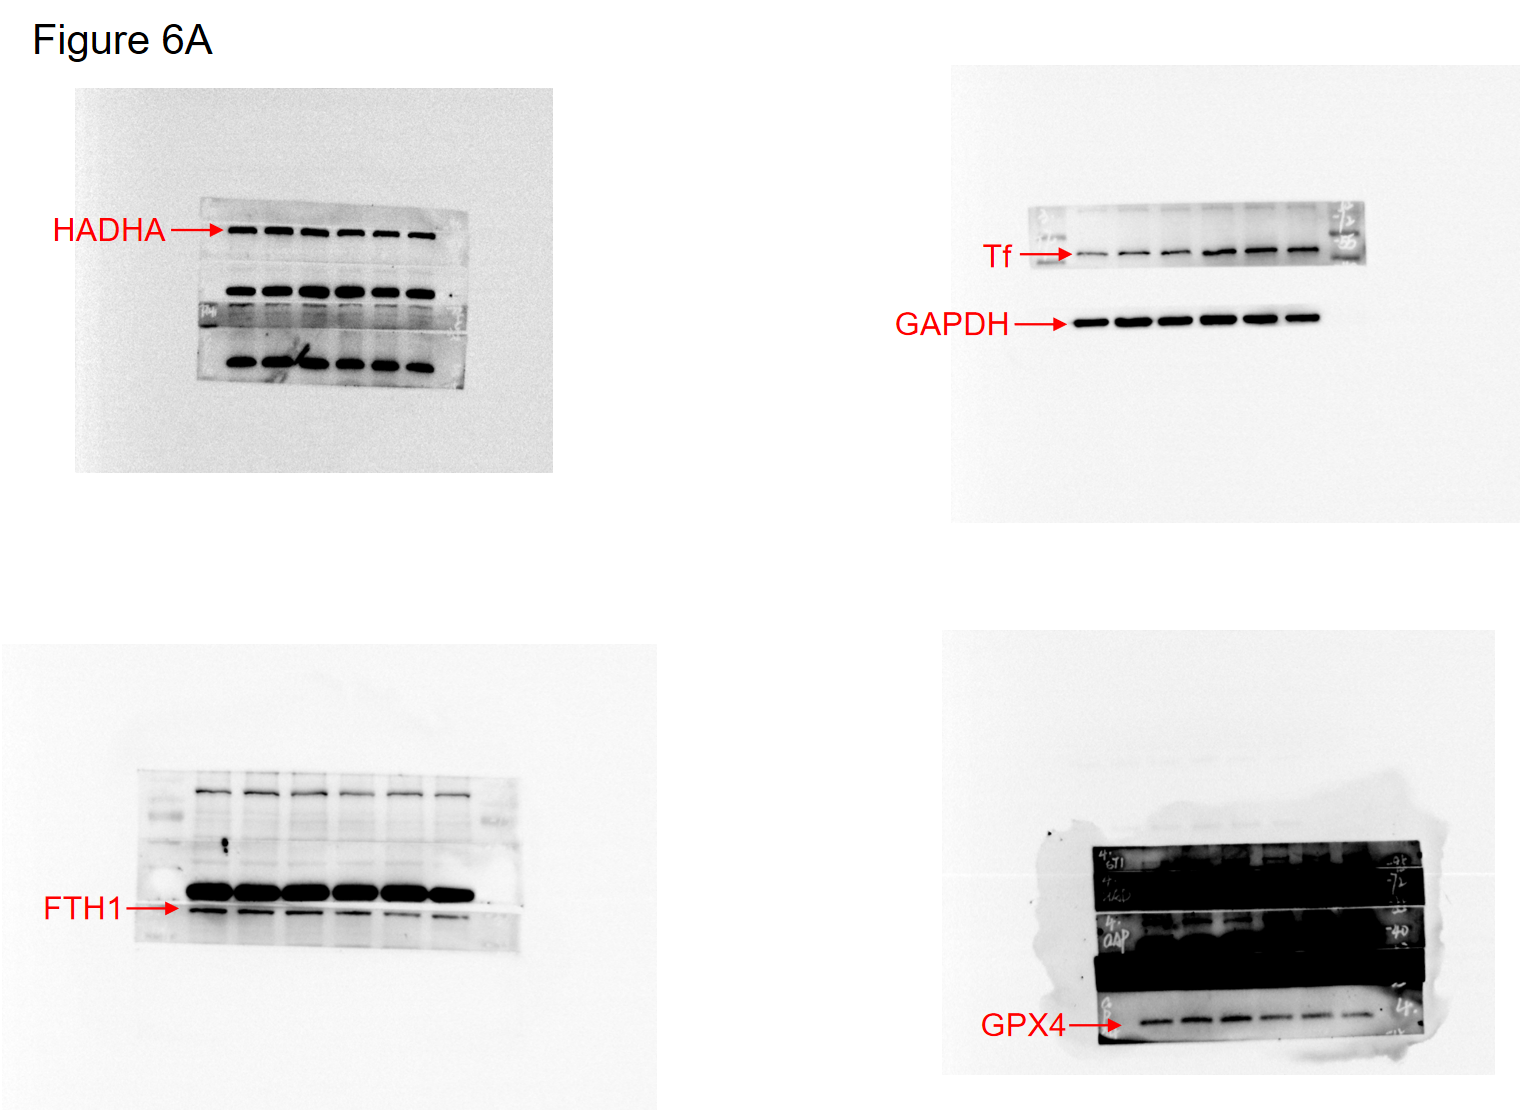

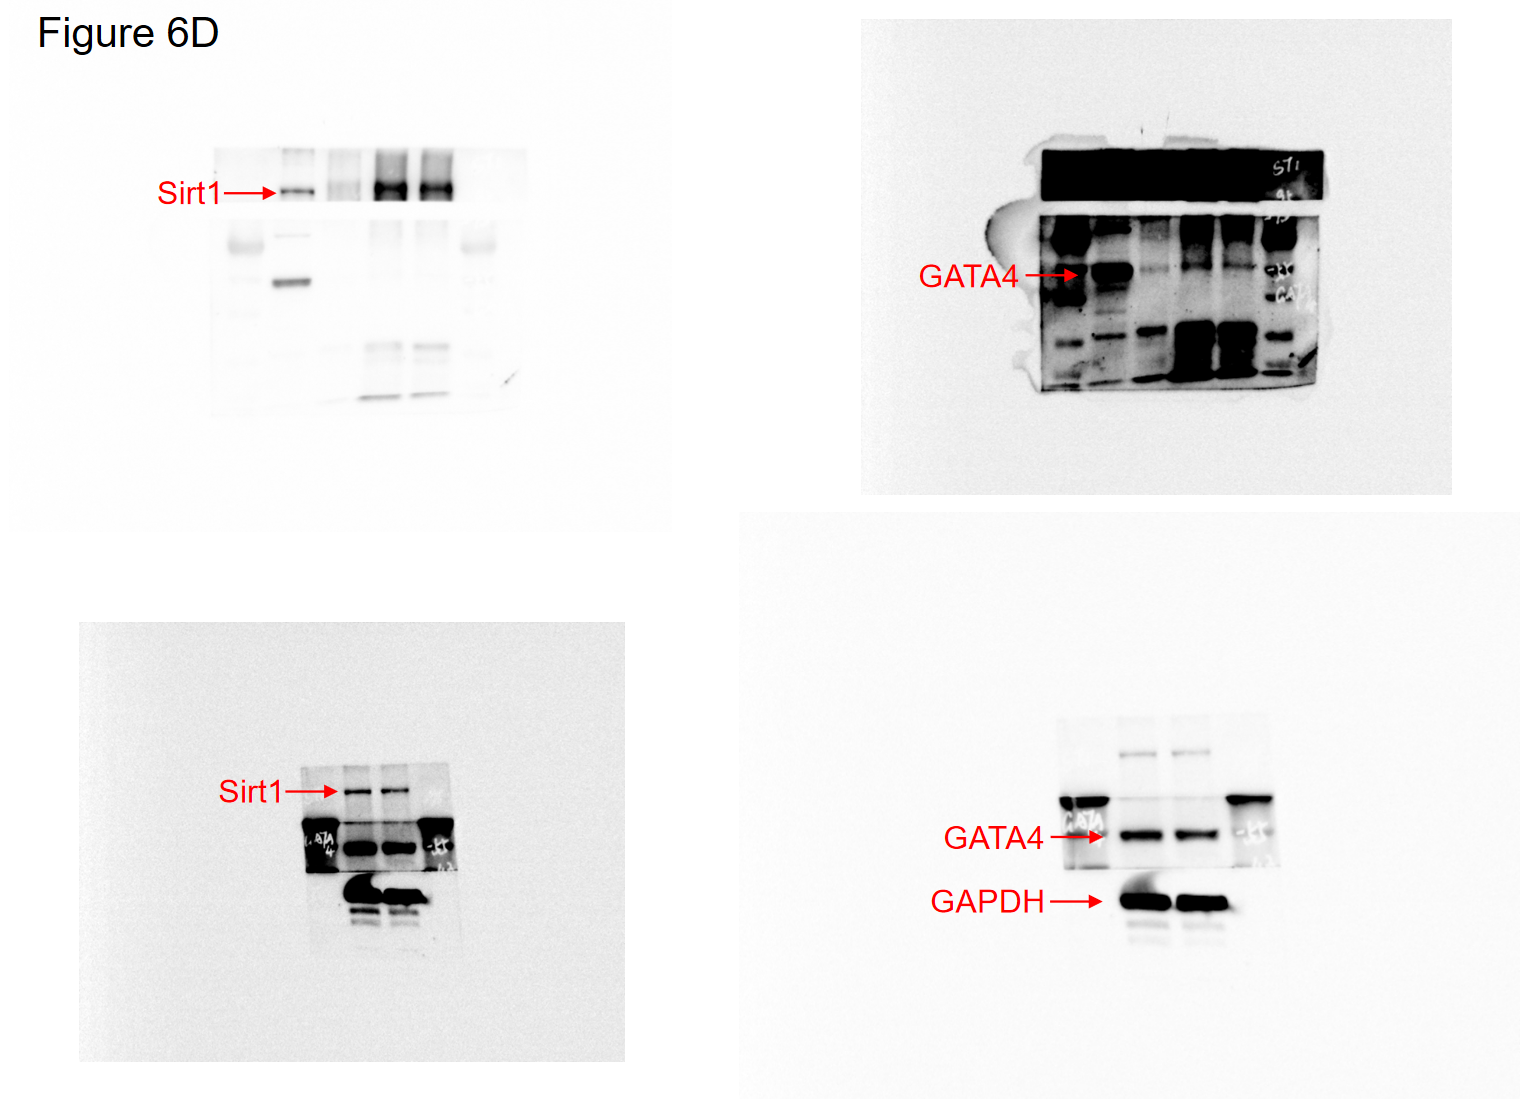

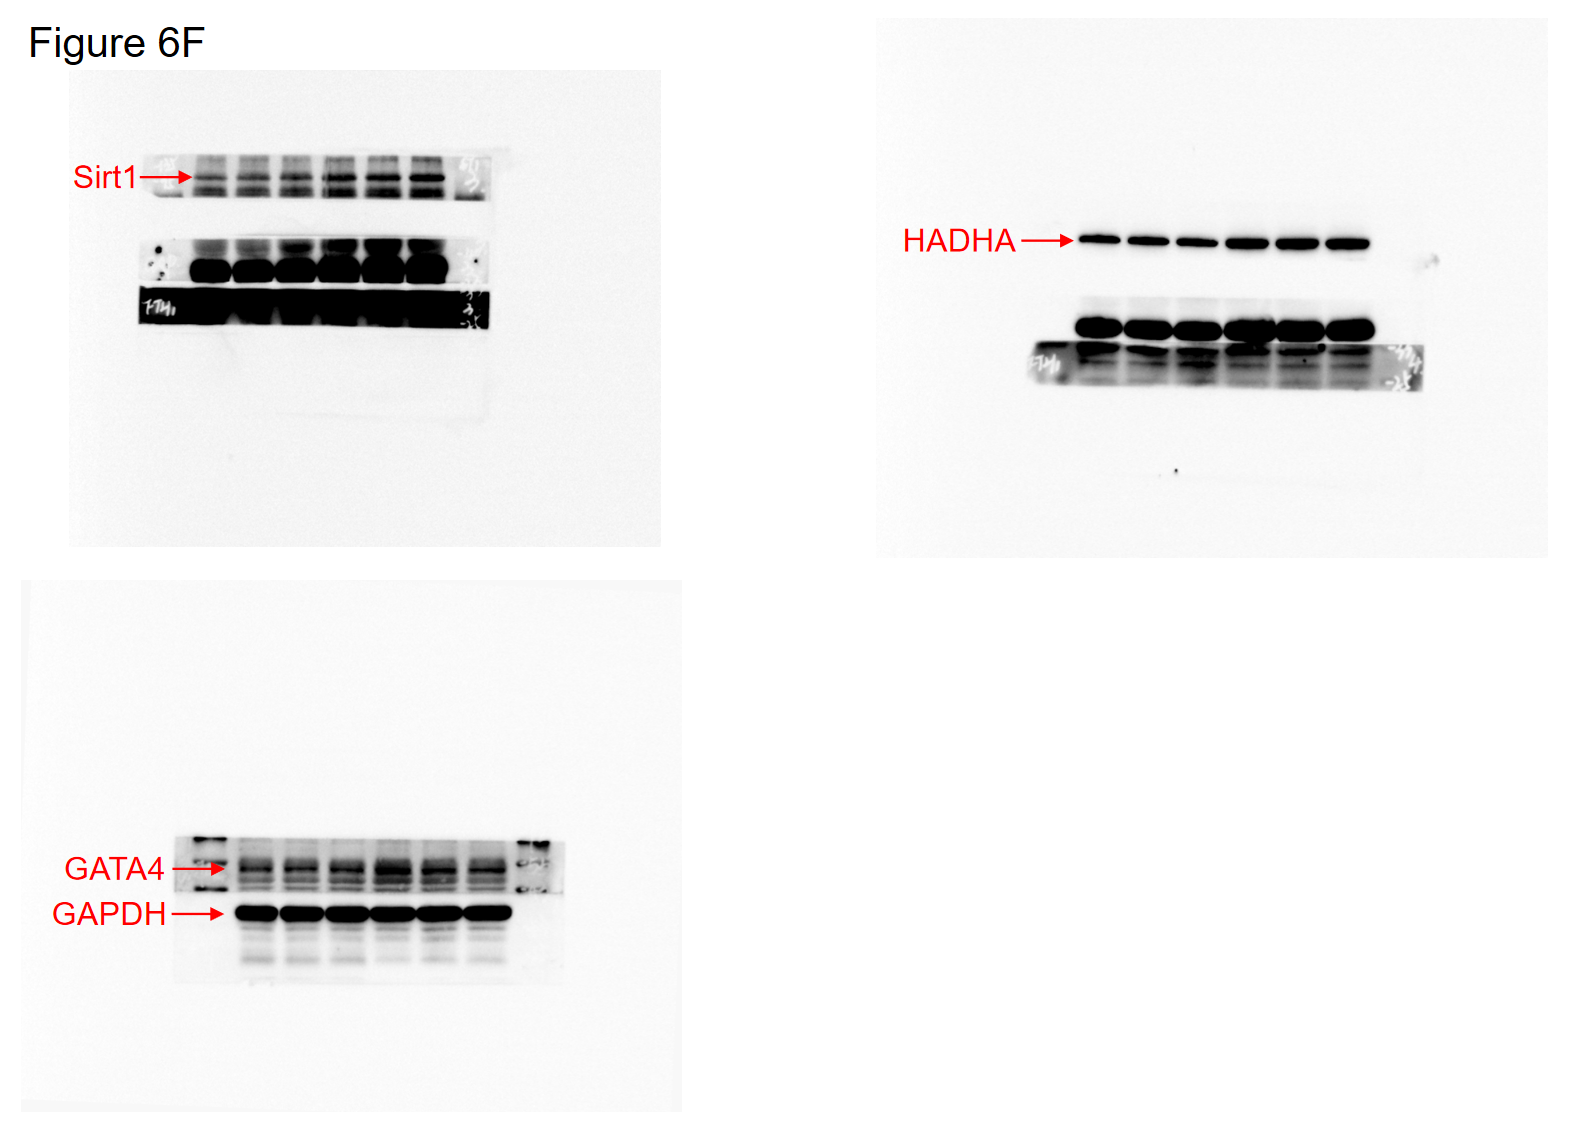

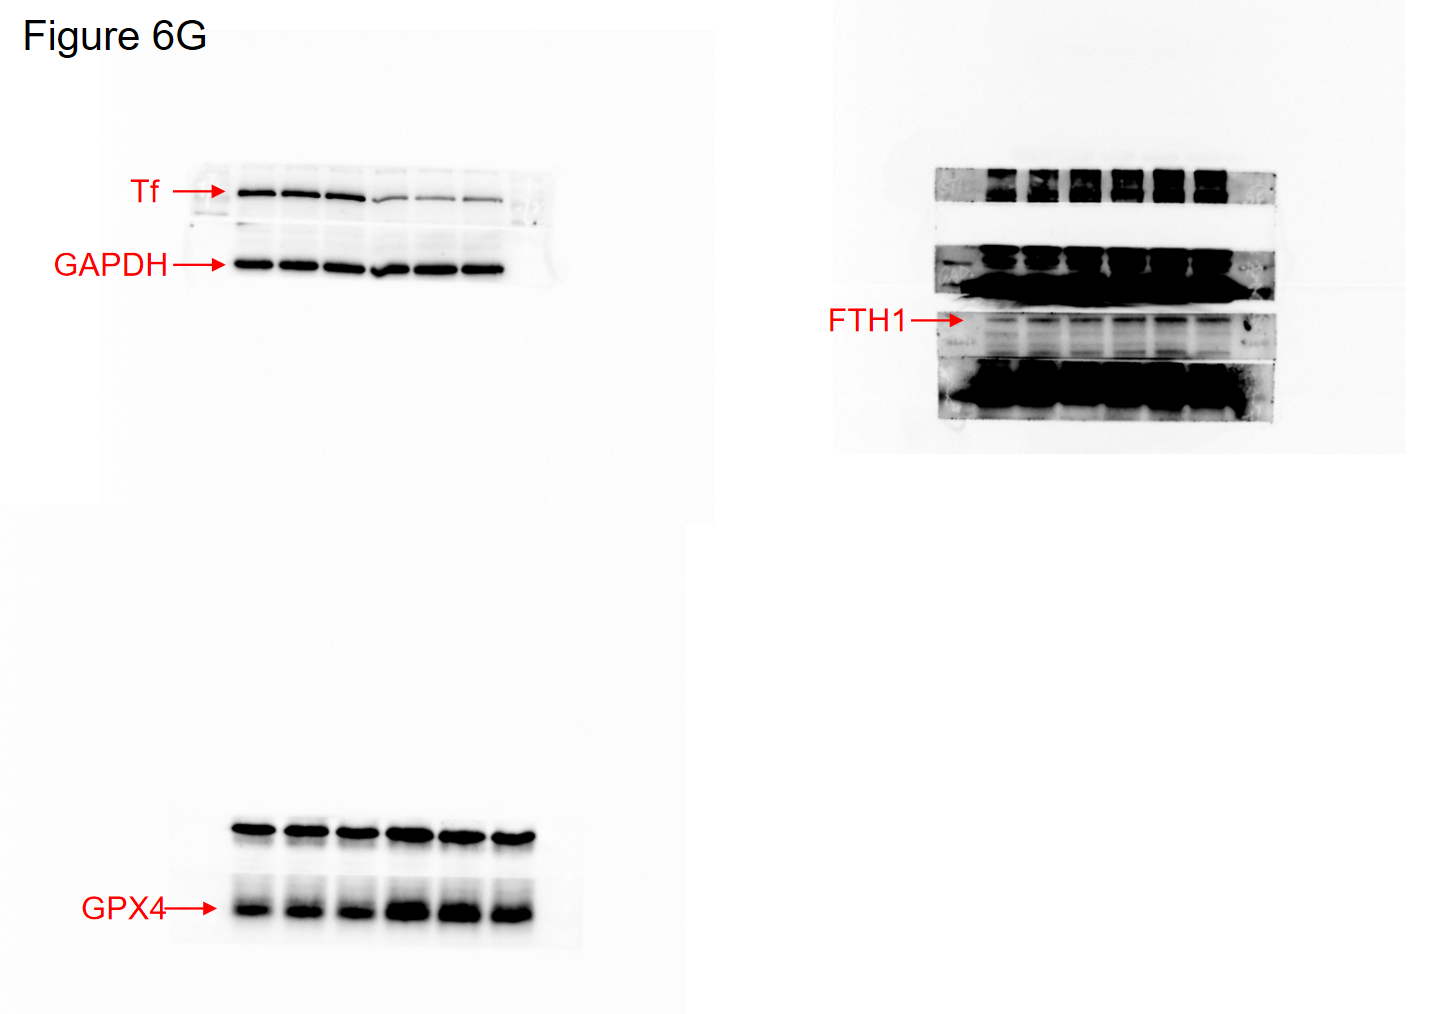

Supplement: Supplementary file 2 [file 955eabd932c07dce141b2eb0.docx]
